# Supplementary material for: Poly(ethylene oxide)-assisted energy funneling for efficient perovskite light emission
Source: Royal Society of Chemistry journal article supplement (doi:10.1039/c9tc01906e), 2019-01-01
Supplement: c9tc01906e1.pdf [file c9tc01906e1.pdf]

# Supporting Information For “Poly(ethylene oxide)- Assisted Energy Funneling for Efficient Perovskite Light Emission”

*Tianfei Xu,<sup>a†</sup> Yan Meng,<sup>a†</sup> Miaosheng Wang,<sup>b</sup> Mingxing Li,<sup>c</sup> Mahshid Ahmadi,<sup>b</sup> Zuhong Xiong,<sup>a</sup>*

*Shubin Yan,<sup>b,d</sup> Ping Chen<sup>a\*,b</sup> and Bin Hu<sup>b\*</sup>*

<sup>a</sup> *School of Physical Science and Technology, Southwest University, Chongqing 400715, China*

<sup>b</sup> *Joint Institute for Advanced Materials, Department of Materials Science and Engineering,*

*University of Tennessee, Knoxville, TN 37996, USA*

<sup>c</sup> *Center for Functional Nanomaterials, Brookhaven National Laboratory, Upton, New York*

*11973, USA*

<sup>d</sup> *Science and Technology on Electronic Test and Measurement Laboratory, North University of*

*China, Taiyuan 030051, China*

## **Corresponding Authors:**

<sup>1\*</sup> E-mail: [chenping206@126.com](mailto:chenping206@126.com) (Ping Chen), <sup>2\*</sup> E-mail: [bhu@utk.edu](mailto:bhu@utk.edu) (Bin Hu).

<sup>†</sup> These authors contributed equally to this work.

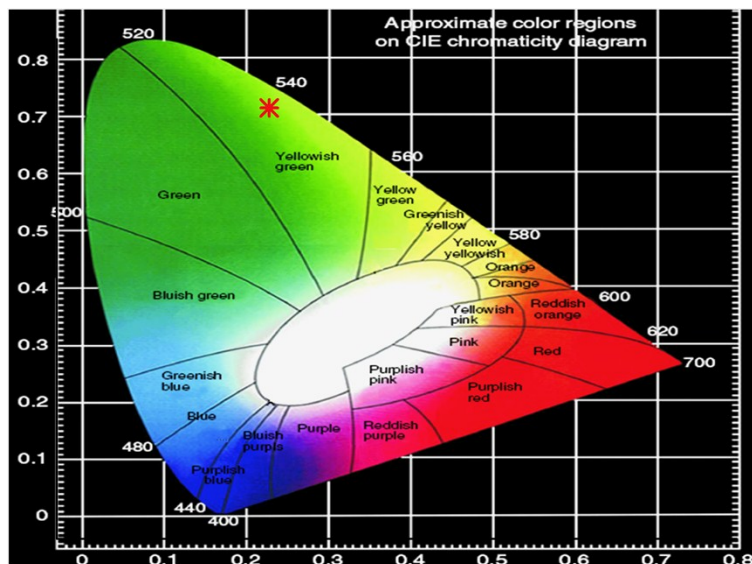

**Figure S1.** The Commission Internationale de l'Eclairage (CIE) color coordinates of PEO:FAPbBr<sub>3</sub> perovskite thin films.

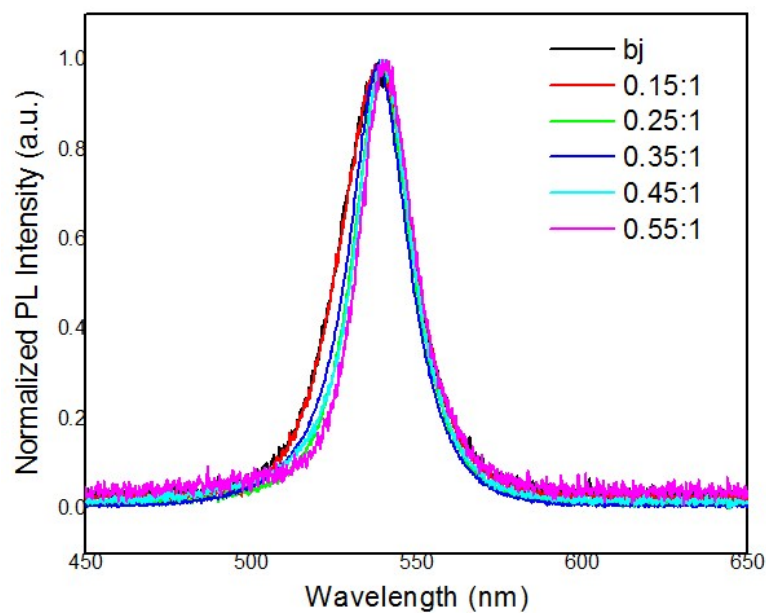

**Figure S2.** Normalized PL spectra of PEO:FAPbBr<sub>3</sub> films with different ratios of PEO.

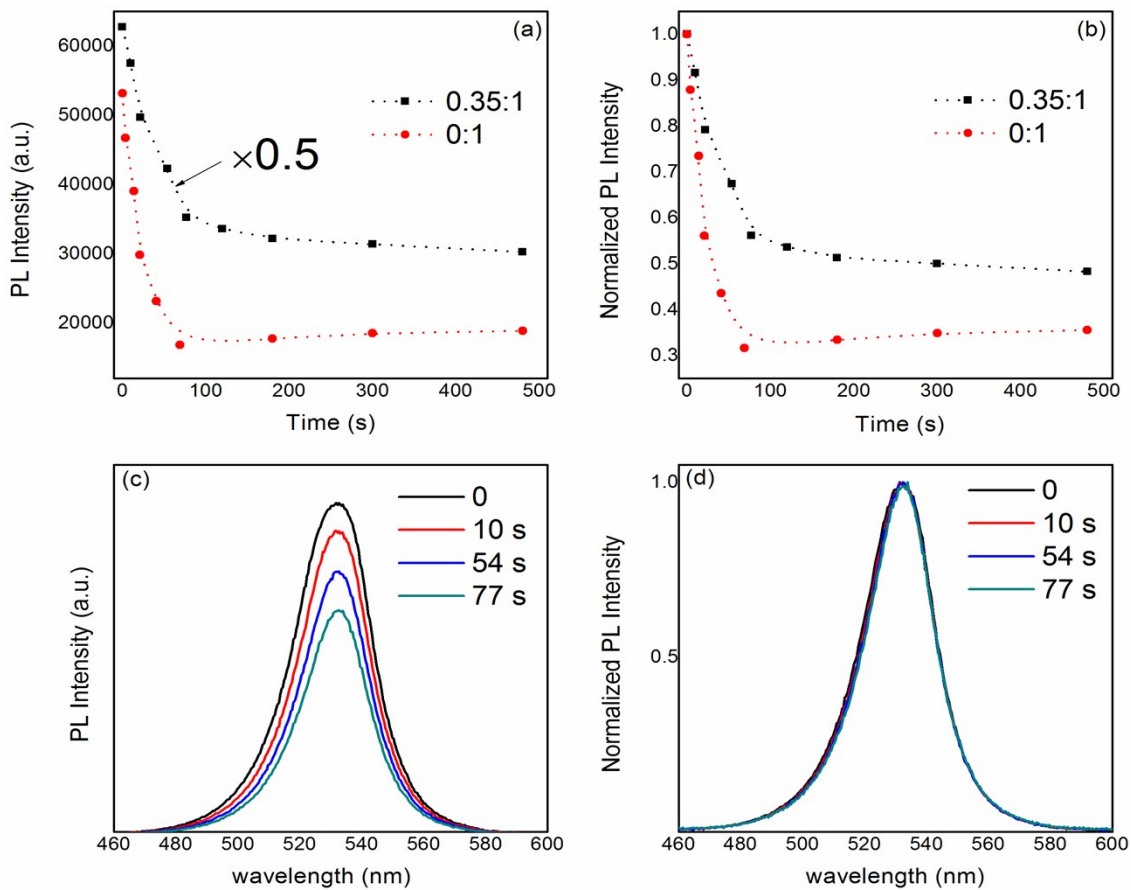

**Figure S3.** The PL stabilities of PEO-FAPbBr<sub>3</sub> film and pure FAPbBr<sub>3</sub> film.

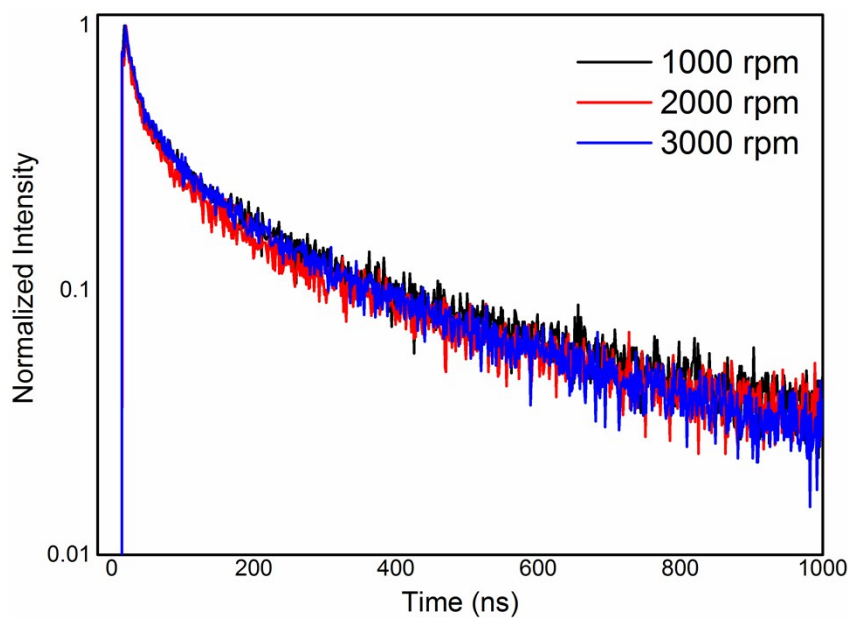

**Figure S4.** The transient PL decays of 0.35:1 film fabricated by different spin-speed.

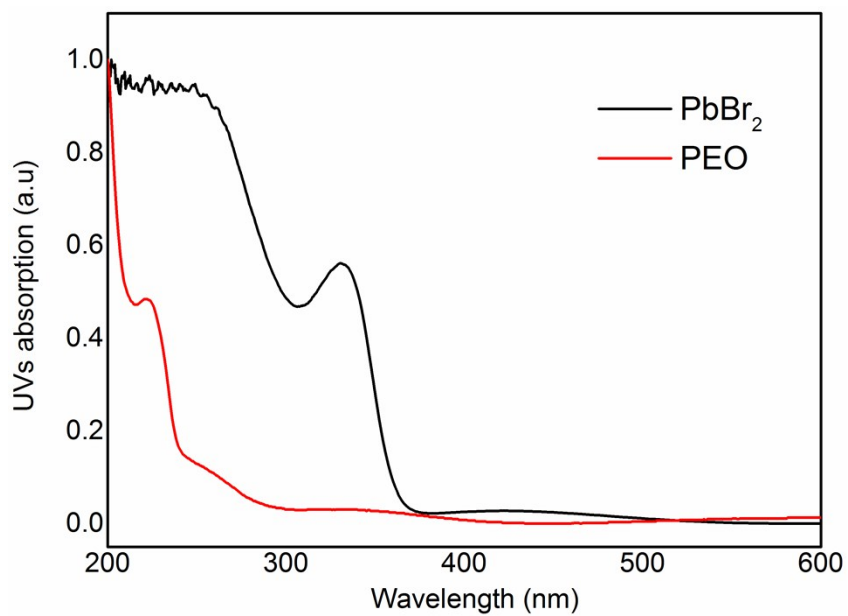

**Figure S5.** The UVs absorption spectrum of the PEO and PbBr<sub>2</sub> films.

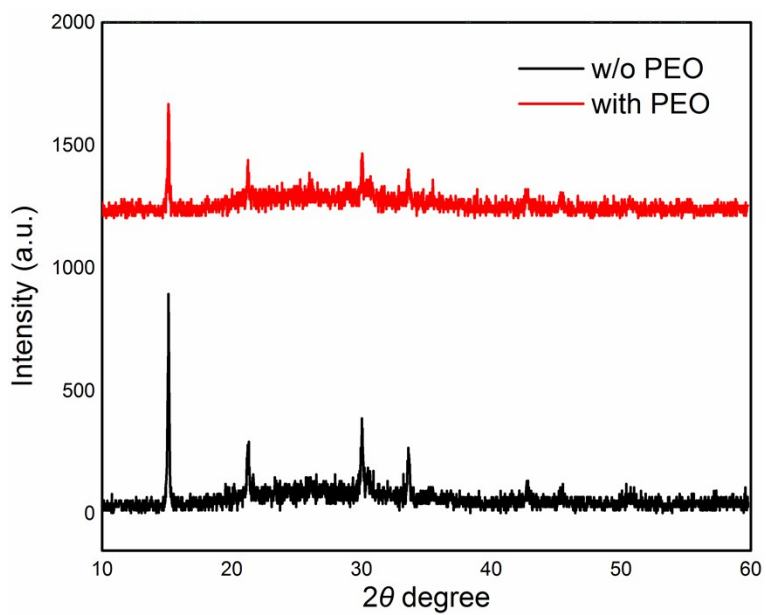

**Figure S6.** The XRD patterns of PEO:FAPbBr<sub>3</sub> perovskite thin film with/without PEO

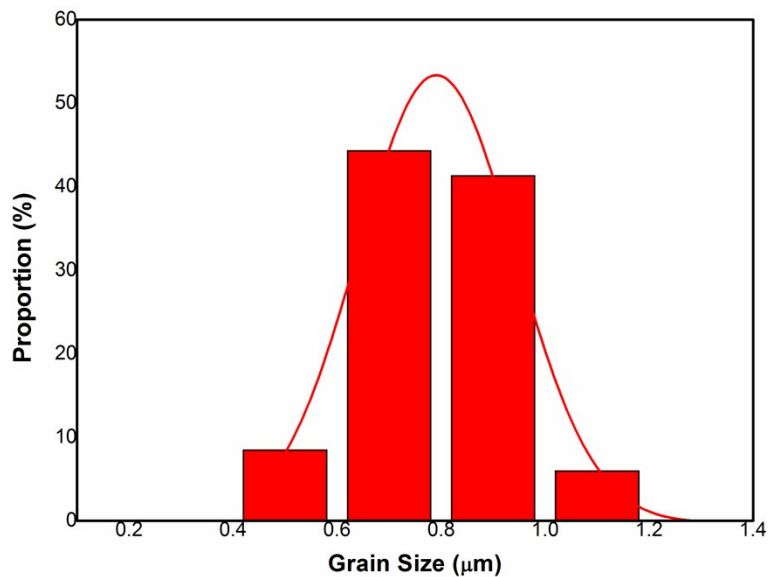

**Figure S7.** The grain size distribution histogram of pure FAPbBr<sub>3</sub> film.

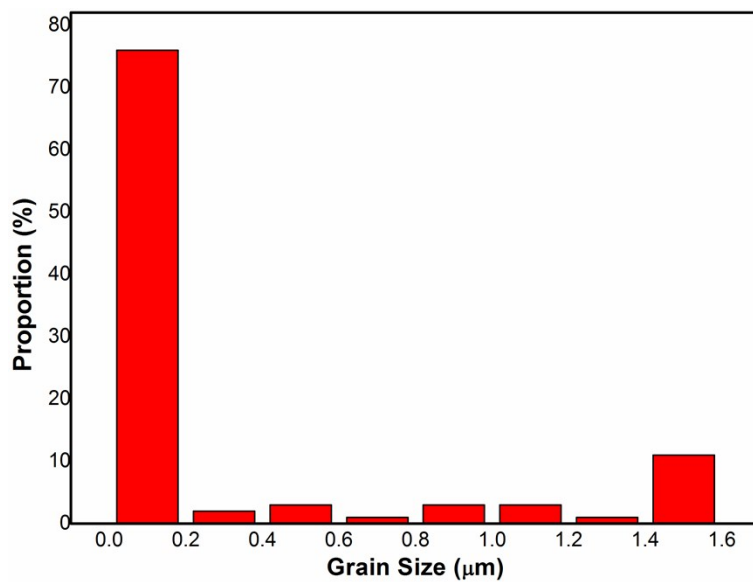

**Figure S8.** The grain size distribution histogram of 0.55:1 film.

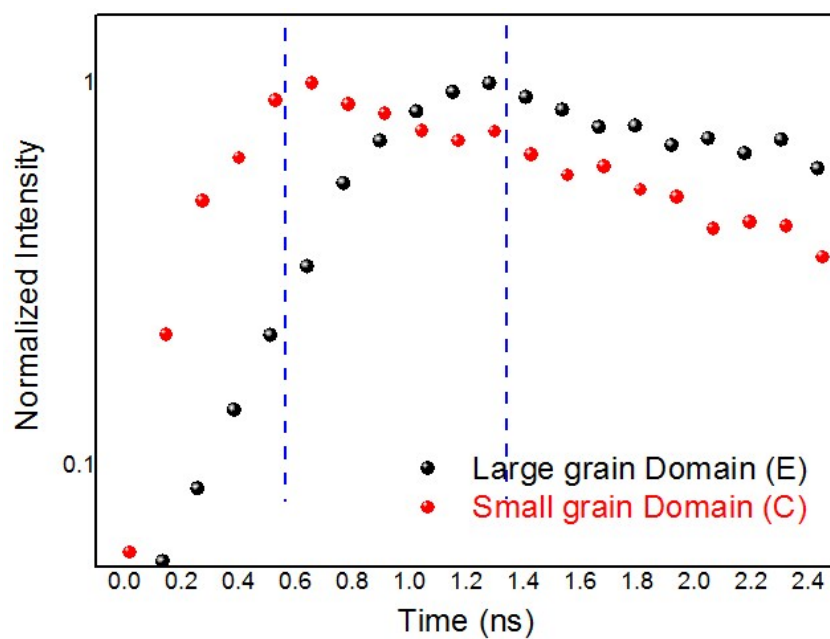

**Figure S9.** The PL lifetime of large grain domain (E) and small grain domain (C) in 0.35:1 film examined in a much shorter time scale (0-2.4 ns).

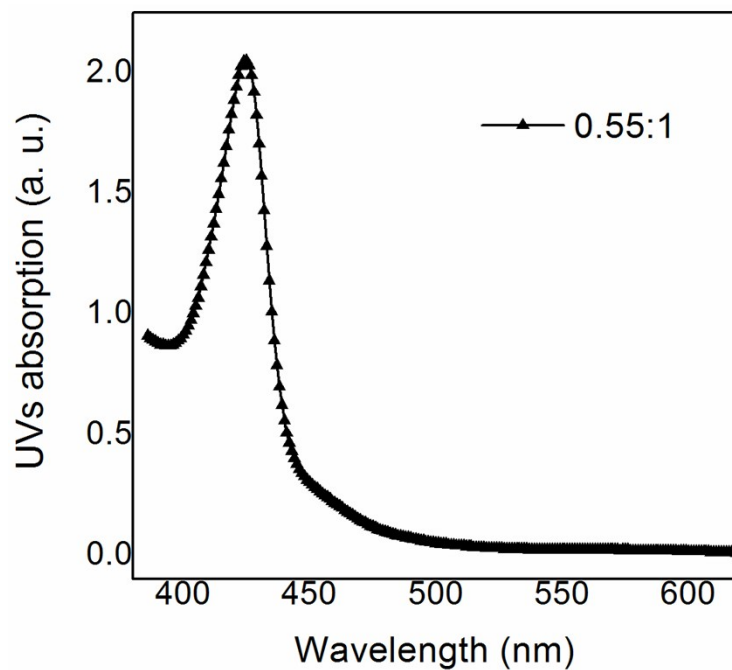

**Figure S10.** The UVs absorption spectrum of the 0.55:1 film.

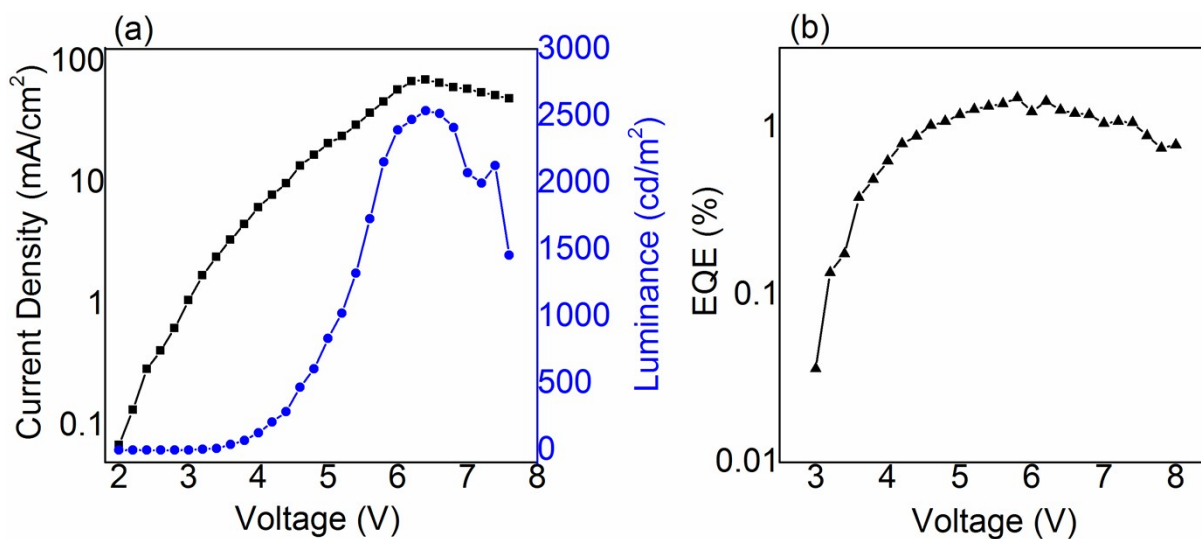

**Figure S11.** The  $J$ - $L$ - $V$  characteristics of PeLEDs based on the structure of ITO/PEDOT:PSS/ PEO:FAPbBr<sub>3</sub> (0.35:1)/TPBi/Cs<sub>2</sub>CO<sub>3</sub>/Al.

**Table S1.** Fitting parameters of transient PL decay curves in Figure 1d.

| Volume ratio | $\tau_1$ (ns) | A <sub>1</sub> (%) | $\tau_2$ (ns) | A <sub>2</sub> (%) | $\tau_3$ (ns) | A <sub>3</sub> (%) | $\tau_{avg}$ (ns) |
|--------------|---------------|--------------------|---------------|--------------------|---------------|--------------------|-------------------|
| 0:1          | 0.13          | 29.33              | 1.26          | 50.98              | 8.71          | 19.70              | 2.39              |
| 0.15:1       | 3.19          | 27.85              | 30.8          | 42.02              | 185.4         | 30.12              | 69.6              |
| 0.25:1       | 11.45         | 59.11              | 78.9          | 24.01              | 438.5         | 16.88              | 99.7              |
| 0.35:1       | 23.63         | 18.90              | 120.0         | 29.34              | 590           | 51.76              | 345.1             |
| 0.45:1       | 19.02         | 22.78              | 116.2         | 33.80              | 563.5         | 43.42              | 288.2             |
| 0.55:1       | 25.0          | 21.91              | 169.5         | 41.81              | 500           | 36.27              | 257.7             |

**Table S2.** PEO:FAPbBr<sub>3</sub> film thickness with different ratios of PEO.

| Volume ratio   | 0            | 0.15:1       | 0.25:1       | 0.35:1       | 0.45:1       | 0.55:1       |
|----------------|--------------|--------------|--------------|--------------|--------------|--------------|
| Thickness (nm) | 600.4 ± 13.4 | 568.3 ± 18.3 | 460.4 ± 28.1 | 373.4 ± 14.8 | 341.6 ± 26.9 | 327.4 ± 15.2 |

**Table S3.** 0.35:1 film thickness with different spin-speed.

| spin-speed (rpm) | 1000         | 2000         | 3000        |
|------------------|--------------|--------------|-------------|
| Thickness (nm)   | 649.5 ± 15.0 | 522.9 ± 25.5 | 418.6 ± 7.8 |



**Table S4.** Fitting parameters of transient PL decays of 0.35:1 film fabricated by different spin-speed.

| spin-speed (rpm) | $\tau_1$ (ns) | A <sub>1</sub> (%) | $\tau_2$ (ns) | A <sub>2</sub> (%) | $\tau_3$ (ns) | A <sub>3</sub> (%) | $\tau_{avg}$ (ns) |
|------------------|---------------|--------------------|---------------|--------------------|---------------|--------------------|-------------------|
| 1000             | 20.6          | 21.80              | 116.8         | 31.63              | 572.0         | 46.56              | 307.7             |
| 2000             | 15.17         | 15.34              | 116.0         | 33.98              | 500.0         | 50.68              | 295.1             |
| 3000             | 23.63         | 18.90              | 120.0         | 29.34              | 590           | 51.76              | 345.1             |

**Table S5.** Fitting parameters of transient PL decay curves in Figure 3g-h.

| Volume Ratio | A <sub>1</sub> (%) | $\tau_1$ (ns) | A <sub>2</sub> (%) | $\tau_2$ (ns) | $\tau_{avg}$ (ns) |
|--------------|--------------------|---------------|--------------------|---------------|-------------------|
| A            | 41.8               | 6.73          | 58.2               | 26.61         | 18.3              |
| B            | 56.8               | 4.97          | 43.2               | 27.49         | 14.7              |
| B'           | 59.0               | 4.83          | 41.0               | 21.34         | 11.6              |
| C            | 84                 | 4.63          | 16                 | 89            | 18.2              |
| D            | 62.8               | 3.97          | 37.2               | 253.7         | 97                |
| E            | 45.1               | 4.79          | 54.9               | 661           | 364               |
| F            | 29.3               | 24.5          | 70.7               | 250           | 167               |
| G            | 36.3               | 42.8          | 63.8               | 265           | 183               |
| H            | 47.6               | 24.1          | 52.4               | 242           | 139               |
